# Supplementary material for: A robust benchmark for evaluating and improving mosaic variant calling strategies
Source: Research Square preprint supplement (doi:10.21203/rs.3.rs-871399/v1), 2022-01-11
Supplement: Supplementary file 2 [file d65c21fa917471617a5b8096.xlsx]

## Sheet: Sup. Table 1
Supplementary Table 1. Number and variant allele frequencies of controls
Category	Product	VAF of variant set (Het% / Hom%)					# SNV	# INDEL	Total		Number of negative controls
		V1	V2	V3	V4	V5
Variant set	Number of SNV (het / hom)	2,518 / 116	5,637 / 313	1,915 / 165	1,954 / 117	5,357 / 311	18403	-	18403		Ref. hom			33093574
	Number of INDEL (het / hom)	60 / 3	155 / 10	51 / 7	42 / 6	127 / 9	-	470	470		Germline	SNV	Het	10774
M1	M1-1	4.0 / 8.0	1.0 / 2.0	-	-	-	8584	228	8812				Hom	7050
	M1-2	4.0 / 8.0	3.0 / 6.0	-	-	-	8584	228	8812			INDEL	Het	211
	M1-3	4.0 / 8.0	25.0 / 50.0	-	-	-	8584	228	8812				Hom	116
	M1-4	9.6 / 19.2	1.0 / 2.0	-	-	-	8584	228	8812
	M1-5	9.6 / 19.2	3.0 / 6.0	-	-	-	8584	228	8812
	M1-6	9.6 / 19.2	25.0 / 50.0	-	-	-	8584	228	8812
	M1-7	28.0 / 56.0	1.0 / 2.0	-	-	-	8584	228	8812
	M1-8	28.0 / 56.0	3.0 / 6.0	-	-	-	8584	228	8812
	M1-9	4.0 / 8.0	0.5 / 1.0	-	-	-	8584	228	8812
M2	M2-1	4.0 / 8.0	-	5.0 / 10.0	0.5 / 1.0	-	6785	169	6954
	M2-2	4.0 / 8.0	-	5.0 / 10.0	3.0 / 6.0	-	6785	169	6954
	M2-3	4.0 / 8.0	-	8.0 / 16.0	0.5 / 1.0	-	6785	169	6954
	M2-4	4.0 / 8.0	-	8.0 / 16.0	3.0 / 6.0	-	6785	169	6954
	M2-5	9.6 / 19.2	-	5.0 / 10.0	0.5 / 1.0	-	6785	169	6954
	M2-6	9.6 / 19.2	-	5.0 / 10.0	3.0 / 6.0	-	6785	169	6954
	M2-7	9.6 / 19.2	-	8.0 / 16.0	0.5 / 1.0	-	6785	169	6954
	M2-8	9.6 / 19.2	-	8.0 / 16.0	3.0 / 6.0	-	6785	169	6954
	M2-9	28.0 / 56.0	-	5.0 / 10.0	0.5 / 1.0	-	6785	169	6954
	M2-10	28.0 / 56.0	-	5.0 / 10.0	3.0 / 6.0	-	6785	169	6954
	M2-11	28.0 / 56.0	-	8.0 / 16.0	0.5 / 1.0	-	6785	169	6954
	M2-12	28.0 / 56.0	-	8.0 / 16.0	3.0 / 6.0	-	6785	169	6954
M3	M3-1	4.0 / 8.0	-	7.5 / 15.0	-	1.0 / 2.0	10382	257	10639
	M3-2	4.0 / 8.0	-	7.5 / 15.0	-	2.0 / 4.0	10382	257	10639
	M3-3	4.0 / 8.0	-	7.5 / 15.0	-	4.0 / 8.0	10382	257	10639
	M3-4	4.0 / 8.0	-	12.0 / 24.0	-	1.0 / 2.0	10382	257	10639
	M3-5	4.0 / 8.0	-	12.0 / 24.0	-	2.0 / 4.0	10382	257	10639
	M3-6	4.0 / 8.0	-	12.0 / 24.0	-	4.0 / 8.0	10382	257	10639
	M3-7	9.6 / 19.2	-	7.5 / 15.0	-	1.0 / 2.0	10382	257	10639
	M3-8	9.6 / 19.2	-	7.5 / 15.0	-	2.0 / 4.0	10382	257	10639
	M3-9	9.6 / 19.2	-	7.5 / 15.0	-	4.0 / 8.0	10382	257	10639
	M3-10	9.6 / 19.2	-	16.0 / 32.0	-	1.0 / 2.0	10382	257	10639
	M3-11	9.6 / 19.2	-	16.0 / 32.0	-	2.0 / 4.0	10382	257	10639
	M3-12	9.6 / 19.2	-	16.0 / 32.0	-	4.0 / 8.0	10382	257	10639
	M3-13	28.0 / 56.0	-	10.0 / 20.0	-	1.0 / 2.0	10382	257	10639
	M3-14	28.0 / 56.0	-	10.0 / 20.0	-	2.0 / 4.0	10382	257	10639
	M3-15	28.0 / 56.0	-	10.0 / 20.0	-	4.0 / 8.0	10382	257	10639
	M3-16	28.0 / 56.0	-	16.0 / 32.0	-	1.0 / 2.0	10382	257	10639
	M3-17	28.0 / 56.0	-	16.0 / 32.0	-	2.0 / 4.0	10382	257	10639
	M3-18	28.0 / 56.0	-	16.0 / 32.0	-	4.0 / 8.0	10382	257	10639
Total							345552	8706	354258

## Sheet: Sup. Table 2
Supplementary Table 2. Evaluation of features
SNV calling							INDEL calling
tool	feature	level	ab	definition	set	AUC	tool	feature	level	ab	definition	set	AUC
MF	refhom_likelihood	Genotype level feature	RLH	reference-homozygous genotype likelihood	A	0.991669	MF	refhom_likelihood	Genotype level feature	RLH	reference-homozygous genotype likelihood	A	0.890581
MF	mosaic_likelihood	Genotype level feature	MLH	mosaic genotype likelihood calculated (assuming uniform distribution of mosaics allele fraction from 0-1)	A	0.97955	MF	mismatches_p	Alignment level feature	NMRS	p-value by Wilcoxon's rank sum test of mismatches per ref reads vs. mismatches per alt reads	A	0.868456
MF	mismatches_p	Alignment level feature	NMRS	p-value by Wilcoxon's rank sum test of mismatches per ref reads vs. mismatches per alt reads	A	0.954285	MF	mosaic_likelihood	Genotype level feature	MLH	mosaic genotype likelihood calculated (assuming uniform distribution of mosaics allele fraction from 0-1)	A	0.81405
MF	dp_diff	Sequencing level feature	Dpdiff	difference of average read depths of local (<200bp) and distant (>2kb) regions	A	0.725968	MF	alt_baseq1b_p	Sequencing level feature	BQpRSpa	p-value by paired Wilcoxon's rank sum test of base qualities from alt reads at mutant position, compared with base qualities from alt reads at 1bp downtream of the mutant position	A	0.684549
MF	alt_baseq1b_p	Sequencing level feature	BQpRSpa	p-value by paired Wilcoxon's rank sum test of base qualities from alt reads at mutant position, compared with base qualities from alt reads at 1bp downtream of the mutant position	A	0.710144	MF	het_likelihood	Genotype level feature	HetLH	Genotype likelihood of the variant being germline heterozygous	A	0.676898
MF	baseq_p	Sequencing level feature	BQRSp	p-value by Wilcoxon's rank sum test of base qualities of ref and alt alleles	A	0.656639	MF	mapq_difference	Alignment level feature	DMQ	difference of average map quality per alt reads vs. average map quality per ref reads	A	0.62985
MF	het_likelihood	Genotype level feature	HetLH	Genotype likelihood of the variant being germline heterozygous	A	0.607538	MF	baseq_t	Sequencing level feature	BQRSz	z-statistics by Wilcoxon's rank sum test of base qualites of alt alleles vs. ref alleles	A	0.623805
MF	baseq_t	Sequencing level feature	BQRSz	z-statistics by Wilcoxon's rank sum test of base qualites of alt alleles vs. ref alleles	A	0.599189	MF	baseq_p	Sequencing level feature	BQRSp	p-value by Wilcoxon's rank sum test of base qualities of ref and alt alleles	A	0.617166
MF	sb_p	Alignment level feature	FS	p-value by Fisher's exact test of strand bias for ref and alt alleles	A	0.592251	MF	GCcontent	Sequencing level feature	GC	proportion of G/C alleles in 20bp genomic region around the mutation, between 10 bp up-stream and down-stream of the mutant position	A	0.615548
MF	alt2_proportion_SNPonly	Genotype level feature	A2P	proportion of reads carrying another alt allele with highest alelel fraction (only work for mosaic SNPs)	A	0.588806	MF	sb_p	Alignment level feature	FS	p-value by Fisher's exact test of strand bias for ref and alt alleles	A	0.590611
MF	GCcontent	Sequencing level feature	GC	proportion of G/C alleles in 20bp genomic region around the mutation, between 10 bp up-stream and down-stream of the mutant position	A	0.577861	MF	mapq_p	Alignment level feature	MQRS	p-value by Wilcoxon's rank sum test of mapping qualities of ref and alt reads	A	0.580053
MF	althom_likelihood	Genotype level feature	HomLH	alternative-homozygous genotype likelihood	A	0.551377	MF	dp_diff	Sequencing level feature	Dpdiff	difference of average read depths of local (<200bp) and distant (>2kb) regions	A	0.566161
MF	indel_proportion_SNPonly	Genotype level feature	IDP	proporiton of indel reads at the mutant position (only work for mosaic SNPs)	A	0.542247	MF	alt_baseq1b_t	Sequencing level feature	BQpRSza	z-statistics by Wilcoxon's rank sum test of base qualities from alt reads at mutant position, compared with base qualities from alt reads at 1bp downtream of the mutant position	A	0.564885
MF	querypos_p	Sequencing level feature	QPW	p-value by Wilcoxon's rank sum test of base query positions of ref and alt alleles	A	0.539876	MF	querypos_p	Sequencing level feature	QPW	p-value by Wilcoxon's rank sum test of base query positions of ref and alt alleles	A	0.544884
MF	leftpos_p	Sequencing level feature	LPW	p-value by Wilcoxon's rank sum test of left-most positions of ref and alt reads	A	0.538797	MF	ref_baseq1b_p	Sequencing level feature	BQpRSpr	p-value by paired Wilcoxon's rank sum test of base qualities from ref reads at mutant position, compared with base qualities from ref reads at 1bp downtream of the mutant position	A	0.539904
MF	ref_softclip	Alignment level feature	SCr	proportion of clipped ref reads with >=10bp of the reads being hard-clippped or soft-clipped	A	0.536118	MF	leftpos_p	Sequencing level feature	LPW	p-value by Wilcoxon's rank sum test of left-most positions of ref and alt reads	A	0.537779
MF	alt_baseq1b_t	Sequencing level feature	BQpRSza	z-statistics by Wilcoxon's rank sum test of base qualities from alt reads at mutant position, compared with base qualities from alt reads at 1bp downtream of the mutant position	A	0.524745	MF	ref_softclip	Alignment level feature	SCr	proportion of clipped ref reads with >=10bp of the reads being hard-clippped or soft-clipped	A	0.517359
MF	ref_baseq1b_t	Sequencing level feature	BQpRSzr	z-statistics by Wilcoxon's rank sum test of base qualities from ref reads at mutant position, compared with base qualities from ref reads at 1bp downtream of the mutant position	A	0.509624	MF	alt_softclip	Alignment level feature	SCa	proportion of clipped alt reads with >=10bp of the reads being hard-clipped or soft-clipped	A	0.510517
MF	mapq_difference	Alignment level feature	DMQ	difference of average map quality per alt reads vs. average map quality per ref reads	A	0.505886	MF	ref_baseq1b_t	Sequencing level feature	BQpRSzr	z-statistics by Wilcoxon's rank sum test of base qualities from ref reads at mutant position, compared with base qualities from ref reads at 1bp downtream of the mutant position	A	0.504945
MF	alt_softclip	Alignment level feature	SCa	proportion of clipped alt reads with >=10bp of the reads being hard-clipped or soft-clipped	A	0.504947	MF	seqpos_p	Sequencing level feature	SCW	p-value by Wilcoxon's rank sum test of base sequencing cycles of ref and alt alleles	A	0.502891
MF	ref_baseq1b_p	Sequencing level feature	BQpRSpr	p-value by paired Wilcoxon's rank sum test of base qualities from ref reads at mutant position, compared with base qualities from ref reads at 1bp downtream of the mutant position	A	0.504151	MF	althom_likelihood	Genotype level feature	HomLH	alternative-homozygous genotype likelihood	A	0.50213
MF	mapq_p	Alignment level feature	MQRS	p-value by Wilcoxon's rank sum test of mapping qualities of ref and alt reads	A	0.501488	MF	conflict_num	Sequencing level feature	CN	number of read pairs supporting both ref and alt alleles	A	0.500345
MF	seqpos_p	Sequencing level feature	SCW	p-value by Wilcoxon's rank sum test of base sequencing cycles of ref and alt alleles	A	0.500202	MF	indel_proportion_SNPonly	Genotype level feature	IDP	proporiton of indel reads at the mutant position (only work for mosaic SNPs)	A	0.5
MF	conflict_num	Sequencing level feature	CN	number of read pairs supporting both ref and alt alleles	A	0.500006	MF	alt2_proportion_SNPonly	Genotype level feature	A2P	proportion of reads carrying another alt allele with highest alelel fraction (only work for mosaic SNPs)	A	0.5
MT2	TLOD	Genotype level feature	TLOD	Log 10 likelihood ratio score of variant existing versus not existing	A	0.968317	MT2	MPOS	Sequencing level feature	MPOS	median distance from end of read	A	0.76435
MT2	MBQ_alt	Sequencing level feature	MBQa	median base quality	A	0.670774	MT2	TLOD	Genotype level feature	TLOD	Log 10 likelihood ratio score of variant existing versus not existing	A	0.746115
MT2	ECNT	Alignment level feature	ECNT	Number of events in this haplotype	A	0.637264	MT2	MBQ_alt	Sequencing level feature	MBQa	median base quality	A	0.725004
MT2	MBQ_ref	Sequencing level feature	MBQr	median base quality	A	0.635968	MT2	MFRL_alt	Sequencing level feature	MFRLa	median fragment length	A	0.568653
MT2	MFRL_ref	Sequencing level feature	MFRLr	median fragment length	A	0.616478	MT2	MMQ_alt	Alignment level feature	MMQa	median mapping quality	A	0.562345
MT2	MMQ_alt	Alignment level feature	MMQa	median mapping quality	A	0.560301	MT2	MFRL_ref	Sequencing level feature	MFRLr	median fragment length	A	0.557365
MT2	MFRL_alt	Sequencing level feature	MFRLa	median fragment length	A	0.524925	MT2	ECNT	Alignment level feature	ECNT	Number of events in this haplotype	A	0.552634
MT2	MPOS	Sequencing level feature	MPOS	median distance from end of read	A	0.520542	MT2	GERMQ	Genotype level feature	GERMQ	Phred-scaled quality that alt alleles are not germline variants	A	0.507994
MT2	GERMQ	Genotype level feature	GERMQ	Phred-scaled quality that alt alleles are not germline variants	A	0.503303	MT2	MBQ_ref	Sequencing level feature	MBQr	median base quality	A	0.502228
MT2	MMQ_ref	Alignment level feature	MMQr	median mapping quality	A	0.500245	MT2	MMQ_ref	Alignment level feature	MMQr	median mapping quality	A	0.501602
MT2	GERMQ	Genotype level feature	GERMQ	Phred-scaled quality that alt alleles are not germline variants	B	0.948726	MT2	GERMQ	Genotype level feature	GERMQ	Phred-scaled quality that alt alleles are not germline variants	B	0.993071
MT2	TLOD	Genotype level feature	TLOD	Log 10 likelihood ratio score of variant existing versus not existing	B	0.924298	MT2	TLOD	Genotype level feature	TLOD	Log 10 likelihood ratio score of variant existing versus not existing	B	0.798472
MT2	MFRL_ref	Sequencing level feature	MFRLr	median fragment length	B	0.737068	MT2	MFRL_ref	Sequencing level feature	MFRLr	median fragment length	B	0.735791
MT2	MFRL_alt	Sequencing level feature	MFRLa	median fragment length	B	0.667255	MT2	MPOS	Sequencing level feature	MPOS	median distance from end of read	B	0.664476
MT2	MBQ_alt	Sequencing level feature	MBQa	median base quality	B	0.619232	MT2	MBQ_ref	Sequencing level feature	MBQr	median base quality	B	0.663723
MT2	MBQ_ref	Sequencing level feature	MBQr	median base quality	B	0.609433	MT2	MFRL_alt	Sequencing level feature	MFRLa	median fragment length	B	0.588518
MT2	ECNT	Alignment level feature	ECNT	Number of events in this haplotype	B	0.531323	MT2	MBQ_alt	Sequencing level feature	MBQa	median base quality	B	0.543933
MT2	MPOS	Sequencing level feature	MPOS	median distance from end of read	B	0.515292	MT2	ECNT	Alignment level feature	ECNT	Number of events in this haplotype	B	0.513875
MT2	MMQ_alt	Alignment level feature	MMQa	median mapping quality	B	0.500719	MT2	MMQ_alt	Alignment level feature	MMQa	median mapping quality	B	0.503238
MT2	MMQ_ref	Alignment level feature	MMQr	median mapping quality	B	0.500104	MT2	MMQ_ref	Alignment level feature	MMQr	median mapping quality	B	0.501766
HC20	QUAL	Genotype level feature	QUAL	The Phred-scaled probability that a REF/ALT polymorphism exists at this site given sequencing data	A	0.962838	HC20	MQRankSum	Alignment level feature	MQRS	Z-score From Wilcoxon rank sum test of Alt vs. Ref read mapping qualities	A	0.682204
HC20	QD	Genotype level feature	QD	Variant Confidence/Quality by Depth	A	0.835635	HC20	QD	Genotype level feature	QD	Variant Confidence/Quality by Depth	A	0.631556
HC20	SOR	Alignment level feature	SOR	Symmetric Odds Ratio of 2x2 contingency table to detect strand bias	A	0.707575	HC20	MQ	Alignment level feature	MQ	RMS Mapping Quality	A	0.629546
HC20	MQ	Alignment level feature	MQ	RMS Mapping Quality	A	0.680759	HC20	BaseQRankSum	Sequencing level feature	BQRS	Z-score from Wilcoxon rank sum test of Alt Vs. Ref base qualities	A	0.607384
HC20	MQRankSum	Alignment level feature	MQRS	Z-score From Wilcoxon rank sum test of Alt vs. Ref read mapping qualities	A	0.669505	HC20	QUAL	Genotype level feature	QUAL	The Phred-scaled probability that a REF/ALT polymorphism exists at this site given sequencing data	A	0.536256
HC20	FS	Alignment level feature	SBFS	Phred-scaled p-value using Fisher's exact test to detect strand bias	A	0.603754	HC20	SOR	Alignment level feature	SOR	Symmetric Odds Ratio of 2x2 contingency table to detect strand bias	A	0.535075
HC20	BaseQRankSum	Sequencing level feature	BQRS	Z-score from Wilcoxon rank sum test of Alt Vs. Ref base qualities	A	0.580852	HC20	FS	Alignment level feature	SBFS	Phred-scaled p-value using Fisher's exact test to detect strand bias	A	0.520877
HC20	ReadPosRankSum	Sequencing level feature	RPRS	Z-score from Wilcoxon rank sum test of Alt vs. Ref read position bias	A	0.578623	HC20	ReadPosRankSum	Sequencing level feature	RPRS	Z-score from Wilcoxon rank sum test of Alt vs. Ref read position bias	A	0.508611
HC200	QUAL	Genotype level feature	QUAL	The Phred-scaled probability that a REF/ALT polymorphism exists at this site given sequencing data	A	0.991517	HC20	QD	Genotype level feature	QD	Variant Confidence/Quality by Depth	B	0.98494
HC200	SOR	Alignment level feature	SOR	Symmetric Odds Ratio of 2x2 contingency table to detect strand bias	A	0.856096	HC20	QUAL	Genotype level feature	QUAL	The Phred-scaled probability that a REF/ALT polymorphism exists at this site given sequencing data	B	0.83719
HC200	QD	Genotype level feature	QD	Variant Confidence/Quality by Depth	A	0.801156	HC20	FS	Alignment level feature	SBFS	Phred-scaled p-value using Fisher's exact test to detect strand bias	B	0.65679
HC200	BaseQRankSum	Sequencing level feature	BQRS	Z-score from Wilcoxon rank sum test of Alt Vs. Ref base qualities	A	0.622231	HC20	BaseQRankSum	Sequencing level feature	BQRS	Z-score from Wilcoxon rank sum test of Alt Vs. Ref base qualities	B	0.654075
HC200	MQ	Alignment level feature	MQ	RMS Mapping Quality	A	0.607006	HC20	ReadPosRankSum	Sequencing level feature	RPRS	Z-score from Wilcoxon rank sum test of Alt vs. Ref read position bias	B	0.591126
HC200	MQRankSum	Alignment level feature	MQRS	Z-score From Wilcoxon rank sum test of Alt vs. Ref read mapping qualities	A	0.582263	HC20	MQRankSum	Alignment level feature	MQRS	Z-score From Wilcoxon rank sum test of Alt vs. Ref read mapping qualities	B	0.556013
HC200	ReadPosRankSum	Sequencing level feature	RPRS	Z-score from Wilcoxon rank sum test of Alt vs. Ref read position bias	A	0.54351	HC20	MQ	Alignment level feature	MQ	RMS Mapping Quality	B	0.514974
HC200	FS	Alignment level feature	SBFS	Phred-scaled p-value using Fisher's exact test to detect strand bias	A	0.502079	HC20	SOR	Alignment level feature	SOR	Symmetric Odds Ratio of 2x2 contingency table to detect strand bias	B	0.501523
HC20	QD	Genotype level feature	QD	Variant Confidence/Quality by Depth	B	0.984648	HC200	QD	Genotype level feature	QD	Variant Confidence/Quality by Depth	B	0.890796
HC20	QUAL	Genotype level feature	QUAL	The Phred-scaled probability that a REF/ALT polymorphism exists at this site given sequencing data	B	0.852985	HC200	QUAL	Genotype level feature	QUAL	The Phred-scaled probability that a REF/ALT polymorphism exists at this site given sequencing data	B	0.861126
HC20	BaseQRankSum	Sequencing level feature	BQRS	Z-score from Wilcoxon rank sum test of Alt Vs. Ref base qualities	B	0.661511	HC200	FS	Alignment level feature	SBFS	Phred-scaled p-value using Fisher's exact test to detect strand bias	B	0.656521
HC20	MQRankSum	Alignment level feature	MQRS	Z-score From Wilcoxon rank sum test of Alt vs. Ref read mapping qualities	B	0.656134	HC200	BaseQRankSum	Sequencing level feature	BQRS	Z-score from Wilcoxon rank sum test of Alt Vs. Ref base qualities	B	0.65016
HC20	MQ	Alignment level feature	MQ	RMS Mapping Quality	B	0.655334	HC200	ReadPosRankSum	Sequencing level feature	RPRS	Z-score from Wilcoxon rank sum test of Alt vs. Ref read position bias	B	0.586349
HC20	FS	Alignment level feature	SBFS	Phred-scaled p-value using Fisher's exact test to detect strand bias	B	0.642196	HC200	MQRankSum	Alignment level feature	MQRS	Z-score From Wilcoxon rank sum test of Alt vs. Ref read mapping qualities	B	0.547021
HC20	SOR	Alignment level feature	SOR	Symmetric Odds Ratio of 2x2 contingency table to detect strand bias	B	0.51406	HC200	MQ	Alignment level feature	MQ	RMS Mapping Quality	B	0.52623
HC20	ReadPosRankSum	Sequencing level feature	RPRS	Z-score from Wilcoxon rank sum test of Alt vs. Ref read position bias	B	0.507389	HC200	SOR	Alignment level feature	SOR	Symmetric Odds Ratio of 2x2 contingency table to detect strand bias	B	0.503278
HC200	QD	Genotype level feature	QD	Variant Confidence/Quality by Depth	B	0.93552	HC200	MQRankSum	Alignment level feature	MQRS	Z-score From Wilcoxon rank sum test of Alt vs. Ref read mapping qualities	A	0.830248
HC200	QUAL	Genotype level feature	QUAL	The Phred-scaled probability that a REF/ALT polymorphism exists at this site given sequencing data	B	0.879583	HC200	MQ	Alignment level feature	MQ	RMS Mapping Quality	A	0.739522
HC200	BaseQRankSum	Sequencing level feature	BQRS	Z-score from Wilcoxon rank sum test of Alt Vs. Ref base qualities	B	0.662376	HC200	QUAL	Genotype level feature	QUAL	The Phred-scaled probability that a REF/ALT polymorphism exists at this site given sequencing data	A	0.713122
HC200	MQRankSum	Alignment level feature	MQRS	Z-score From Wilcoxon rank sum test of Alt vs. Ref read mapping qualities	B	0.65708	HC200	BaseQRankSum	Sequencing level feature	BQRS	Z-score from Wilcoxon rank sum test of Alt Vs. Ref base qualities	A	0.568547
HC200	MQ	Alignment level feature	MQ	RMS Mapping Quality	B	0.655861	HC200	SOR	Alignment level feature	SOR	Symmetric Odds Ratio of 2x2 contingency table to detect strand bias	A	0.5592
HC200	FS	Alignment level feature	SBFS	Phred-scaled p-value using Fisher's exact test to detect strand bias	B	0.643292	HC200	FS	Alignment level feature	SBFS	Phred-scaled p-value using Fisher's exact test to detect strand bias	A	0.536714
HC200	SOR	Alignment level feature	SOR	Symmetric Odds Ratio of 2x2 contingency table to detect strand bias	B	0.51315	HC200	QD	Genotype level feature	QD	Variant Confidence/Quality by Depth	A	0.520056
HC200	ReadPosRankSum	Sequencing level feature	RPRS	Z-score from Wilcoxon rank sum test of Alt vs. Ref read position bias	B	0.506965	HC200	ReadPosRankSum	Sequencing level feature	RPRS	Z-score from Wilcoxon rank sum test of Alt vs. Ref read position bias	A	0.514843
DM	score2	Genotype level feature	score2	potential mosaic possibility	A	0.73154
DM	score1	Genotype level feature	score1	het and homo probability	A	0.629589
DM	score3	Genotype level feature	score3	more potential mosaic possibility	A	0.629431
DM	homopolymer	Alignment level feature	HomPM	-	A	0.542713
DM	depth_fraction	Sequencing level feature	Dpfrac	depth/average_depth	A	0.539889
DM	dinucluotide	Alignment level feature	diNT	-	A	0.501365
DM	score2	Genotype level feature	score2	potential mosaic possibility	B	0.999816
DM	score3	Genotype level feature	score3	more potential mosaic possibility	B	0.844396
DM	depth_fraction	Sequencing level feature	Dpfrac	depth/average_depth	B	0.810746
DM	score1	Genotype level feature	score1	het and homo probability	B	0.690995
DM	homopolymer	Alignment level feature	HomPM	-	B	0.554939
DM	dinucluotide	Alignment level feature	diNT	-	B	0.501511

## Sheet: Sup. Table 3
Supplementary Table 3. Evaluation of filter efficiencies
MT2 filters (SNV)						MT2 filters (INDEL)
	True positive counts	False positive counts			F1 score		True positive count	False positive counts			F1 score
		Total	non-variant sites	Germline variants				Total	non-variant sites	Germline variants
Default mode	290359	59709	895	58814	0	Default mode	4057	1844	551	1293	0
Disabled filter	Additional true positive	Additional false positive			F1 score difference	Disabled filter	Additional true positive	Additional false positive			F1 score difference
		Total	non-variant sites	Germline variants				Total	non-variant sites	Germline variants
clustered_events	9575	995	503	492	-0.000602276	haplotype	130	37	28	9	-0.000386007
haplotype	2674	475	8	467	-5.72314e-05	slippage	1175	765	765	0	0.00699822
strand_bias	961	373	373	0	0.000164527	clustered_events	187	103	64	39	0.000919344
map_qual	164	54	1	53	1.16839e-05	panel_of_normals	60	3205	4	3201	0.0378093
weak_evidence	54	266	266	0	0.000151187	weak_evidence	79	189	189	0	0.00446859
position	3	4	4	0	1.99873e-06	germline	7	0	0	0	0.0226663
base_qual	3	53	53	0	3.10455e-05	strand_bias	6	45	45	0	0.00128661
panel_of_normals	7	8049	70	7979	0.00422793	map_qual	3	3	3	0	5.69457e-05
fragment	0	10	10	0	5.93234e-06	position	0	10	10	0	0.000306518
						fragment	0	25	25	0	0.000760654
						base_qual	0	4	4	0	0.000122972
						multiallelic	0	1	1	0	3.07887e-05
HC200 filters (SNV)						HC200 filters (INDEL)
	True positive count	False positive counts			F1 score		True positive count	False positive counts			F1 score
		Total	non-variant sites	Germline variants				Total	non-variant sites	Germline variants
Default mode	86665	693822	405	693417	0	Default mode	3003	12925	172	12753	0
Disabled filter	Additional true positive	Additional false positive			F1 score difference	Disabled filter	Additional true positive	Additional false positive			F1 score difference
		Total	non-variant sites	Germline variants				Total	non-variant sites	Germline variants
QD	233874	160967	160967	0	-0.00197208	QD	4890	35157	35157	0	0.00157593
MQ	104	1485	3	1482	9.21844e-07	MQ	18	0	0	0	-3.36532e-05
FS	13	20	15	5	-1.19453e-07	FS	1	9	9	0	1.96008e-06
LowCoverage	0	12	12	0	1.70213e-08
ReadPosRankSum	0	5	5	0	7.09227e-09
